# Supplementary material for: Isoniazid Killing of Mycobacterium smegmatis NADH Pyrophosphatase Mutant at Single-Cell Level using Microfluidics and Time-Lapse Microscopy
Source: PubMed Central journal article supplement (PMC5589797; doi:10.1038/s41598-017-11503-7), 2017-09-07
Supplement: 41598_2017_11503_MOESM1_ESM.pdf [file 41598_2017_11503_MOESM1_ESM.pdf]

**Isoniazid Killing of *Mycobacterium smegmatis* NADH Pyrophosphatase Mutant at Single-Cell Level using Microfluidics and Time-Lapse Microscopy**

*Meltem Elitas*<sup>1,2</sup>

Author's current address: <sup>1</sup>Sabanci University, Orta Mah. No: 27, Tuzla, Istanbul, 34956, Turkey.  
[melitas@sabanciuniv.edu](mailto:melitas@sabanciuniv.edu).

Author performed the work: <sup>2</sup>School of Life Sciences, École polytechnique fédérale de Lausanne (EPFL), 1015 Lausanne, Switzerland.

## Supplementary

**Growth of the *msm1946::Tn* transposon mutant.** The *msm1946::Tn* transposon mutant grew indistinguishably from wild-type bacteria in standard 7H9 liquid medium (Supplementary Figure 1).

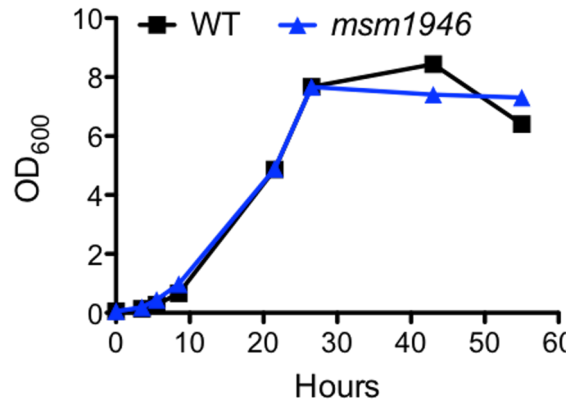

**Supplementary Figure 1 Growth of the *msm1946::Tn* transposon mutant in 7H9 medium.** Growth was monitored by measuring culture turbidity (OD<sub>600nm</sub>) at the indicated time points. Results are representative of at least two experiments.

**Complementation of the *msm1946::Tn* Mutant.** For complementation of the *msm1946::Tn* transposon mutant, the *msm1946* gene was PCR-amplified from wild-type *M. smegmatis* genomic DNA (Supplementary Figure 2). The full-length gene was cloned into integrating plasmid as described below.

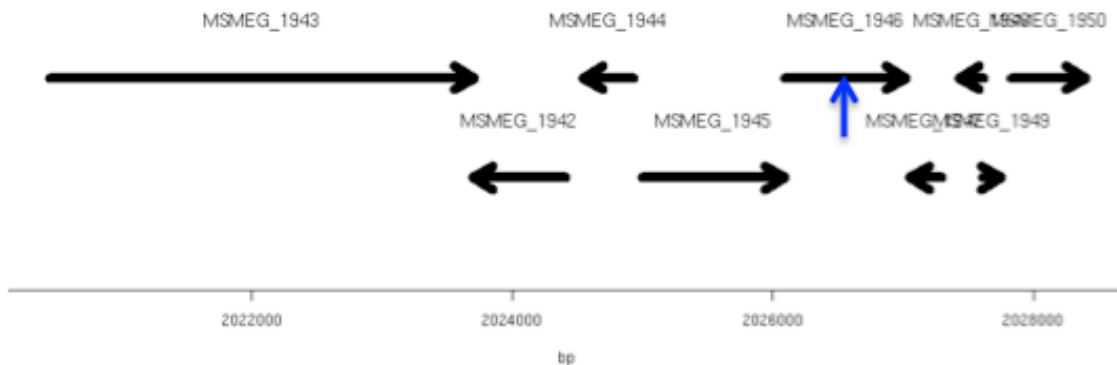

**Supplementary Figure 2 Chromosomal locus encoding the *msm1946* gene in *M. smegmatis*.** Location of the transposon insertion indicated by vertical arrow.

**Integrative complementation (*pND200\_Strep\_msm1946*).** Complementation of the *msm1946::Tn* mutant with a single-copy attB-integrating plasmid (*pND200\_Strep*) containing the intact *msm1946* gene was performed. The INH-mediated killing response of the *pND200\_Strep\_msm1946* strain followed wild-type kinetics only for the first 24 hours of drug

exposure; thereafter, the killing kinetics were slower than wild type (Supplementary Figure 3). The minimum inhibitory concentrations for INH of the integrative complemented and over-expression strains were higher than 100 µg/ml (compared to 5 µg/ml for wild-type bacteria).

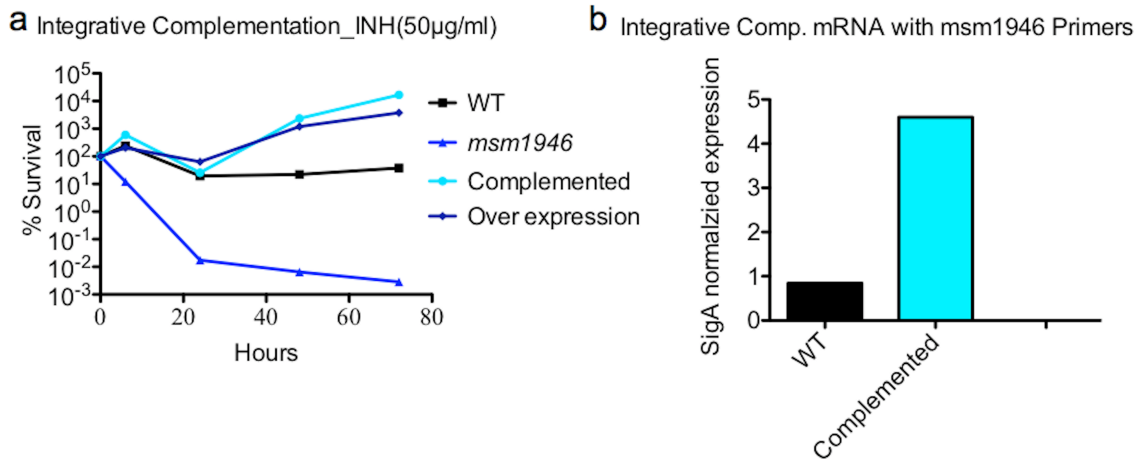

**Supplementary Figure 3 Integrative complementation of *msm1946* mutant and its over expression in WT *M. Smegmatis*.** **a)** INH mediated killing for WT *M. smegmatis* (black), persister down mutant (triangle), its complementation with an integrative plasmid (circle) and over expression of the gene *msm1946* in WT background (diamond). **b)** Real-time RT-qPCR of the *M. smegmatis* wild-type strain (black), and its integrative complementation (light blue). Cells were grown until the exponential growth phase was reached (OD<sub>600</sub>, approximately 0.5 - 0.8). RNA was isolated and transcription of *msm1946* gene was monitored by real-time RT-qPCR using specific primer set for *msm1946*. For each gene, expression levels normalized to constitutive gene, *SigA*.

Nonetheless, the integrative complemented or overexpression strains exhibited impaired growth in 7H9 medium. Failure to achieve appropriate levels of complementation might still be attributable to the unbalanced expression of the *msm1946* gene from the strong *hsp60* promoter of the pND200 integrating vector.

**mRNA levels of *inhA* and *katG* in the *msm1946::Tn* mutant.** Since KatG is involved in the activation of INH and *inhA* is the target gene for INH, the relative mRNA levels of *katG* and *inhA* were measured for the wild-type, *msm1946::Tn* mutant, and integratively-complemented *msm1946::Tn* strains. *katG* and *inhA* mRNA levels were not altered in the *msm1946::Tn* mutant compared to wild-type. However, both of these genes were expressed at slightly reduced levels in the complemented strain (Supplementary Figure 4). As a control, *msm1946* levels were also measured (Supplementary Figure 4).

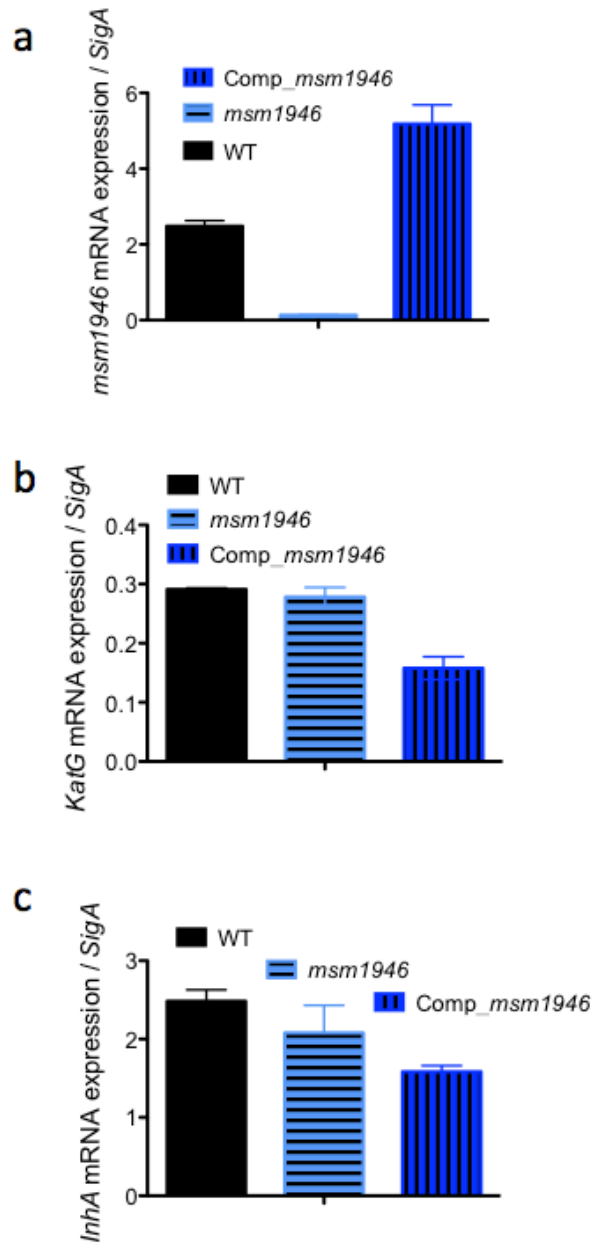

**Supplementary Figure 4** *katG* and *inhA* mRNA expression levels in wild-type, *msm1946::Tn* transposon mutant, and *msm1946::Tn* complemented strains. Bars represent ratio of *msm1946* a), *katG* b), and *inhA* c) mRNA levels relative to *sigA* mRNA (control). *sigA* is a constitutively transcribed gene encoding the housekeeping sigma factor of RNA polymerase. The number of transcript copies was determined by qRT-PCR using gene-specific primers listed.

**INH-Resistance Test.** In the context of INH killing, the *msm1946::Tn* transposon mutant was never observed to acquire INH resistance after 48 hours of drug treatment, unlike wild-type cells, which typically "bounced back" after 48 hours due to emergence of drug-resistant variants. In order to determine whether the *msm1946::Tn* mutant was capable of becoming INH resistant, the

mutant and wild-type cells were grown to  $OD_{600nm}$  0.4 and 10-fold serial dilutions were plated onto LB solid medium containing INH at 0, 0.6, 6.0, or 60  $\mu\text{g/ml}$ . The plates were incubated at 37°C degrees for several days to permit colonies to form. Single colonies of mutant and wild-type cells were picked from the plates containing 0.6  $\mu\text{g/ml}$  INH, which exhibited colony formation for both the mutant and wild-type cells (Supplementary Figure 5). Next, single colonies were inoculated in standard 7H9 medium and stocks of the cultures were prepared and named WT\_0.6 and *msm1946\_0.6*. Growth of these strains in 7H9 medium (no drug) was indistinguishable from wild-type (Supplementary Figure 5).

Thus, neither the WT\_0.6 nor the *msm1946\_0.6* strain was resistant to INH at 50  $\mu\text{g/ml}$  although these strains readily grew on LB plates containing INH at 0.6  $\mu\text{g/ml}$ . To confirm that these strains were not strongly INH resistant, the MIC values were determined using the micro-dilution method (see the Materials and Methods). Although the MIC value of the parental *msm1946::Tn* mutant was 0.39  $\mu\text{g/ml}$  INH, the *msm1946\_0.6* strain managed to grow in 7H9 medium containing INH at 12.5  $\mu\text{g/ml}$ , suggesting that this strain might have acquired low-level resistance to INH.

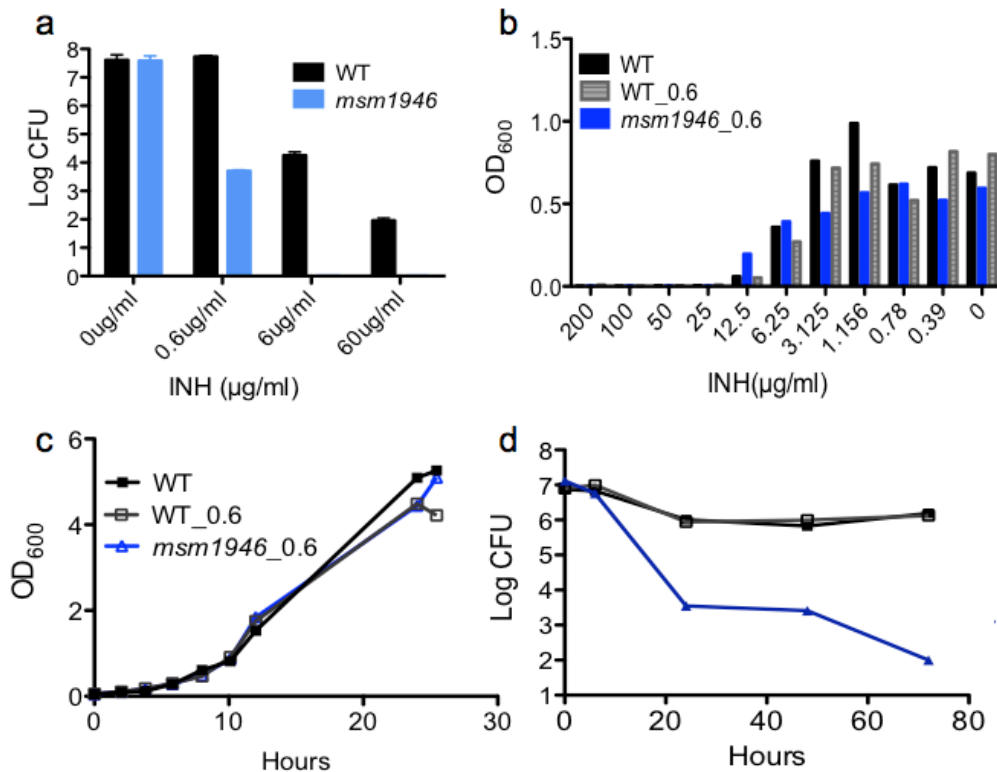

**Supplementary Figure 5 a)** The frequencies of INH resistance were determined by plating wild-type and *msm1946::Tn* mutant cells onto LB solid medium containing INH at 0, 0.6, 6.0, or 60  $\mu\text{g/ml}$ . **b)** The WT\_0.6 and *msm1946\_0.6* single colonies were picked from LB agar plates containing INH 0.6  $\mu\text{g/ml}$ . WT\_0.6 and *msm1946\_0.6* cells grew like wild-type in standard 7H9 medium (no drug). Growth was

monitored by measuring culture turbidity ( $OD_{600nm}$ ) at the indicated time points. c) Drug specificity and INH-mediated killing for the *WT\_0.6* and *msm1946\_0.6* strains. *M. smegmatis* wild-type and the *WT\_0.6* and *msm1946\_0.6* strains were exposed to INH 50  $\mu$ g/ml. Serial dilutions of the INH-treated cultures were plated at the indicated time points to determine the surviving CFU count. Results are the means  $\pm$  standard errors of three independent cultures. d) The INH MICs of the *msm1946\_0.6* and *WT\_0.6* strains were not different than wild-type. The MIC values were determined by measuring growth by monitoring turbidity ( $OD_{600nm}$ ) of the cultures grown in 7H9 medium containing the indicated concentrations of INH.

**Stress Response.** In addition to drug specificity, sensitivity of the *msm1946::Tn* mutant to other stresses was assessed, including thermal stress exposure to the detergent sodium dodecyl sulfate (SDS) acidic pH, and nutrient starvation by incubation of cells in phosphate-buffered saline (PBS) (Supplementary Figure 6). The *msm1946::Tn* transposon mutant did not show increased sensitivity to any of these stresses (i.e., the mutant was equally sensitive as wild-type cells), which suggests that hypersensitivity to the mutant had INH sensitivity otherwise it behaves like WT, which encourages to investigate the underlying INH killing mechanism for this mutant.

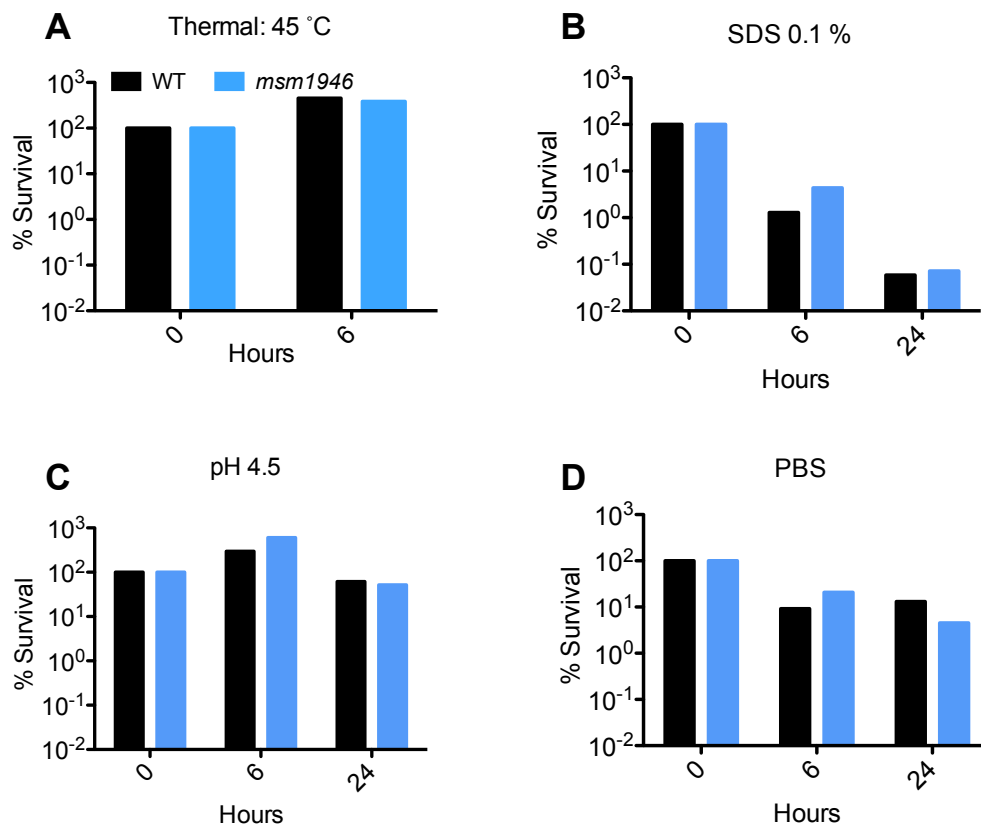

**Supplementary Figure 6 Sensitivity of the *msm1946::Tn* mutant and wild-type cells to thermal, SDS, pH, and PBS.** Percent survival of WT and the *msm1946* mutant at 45 °C, after incubation in 7H9 in the presence of 0.1 % SDS, pH 4.5, PBS were determined

**Primer used for sequencing transposon mutants:**

*Mycomarseq:* CTT CTG AGC GGG ACT CTG GGG

**Primers for complementation constructs:**

*msm1946\_ORF\_F*: GCT AGC AGC GAA CAC CGC ACG TTC GGG CTC

*msm1946\_ORF\_R*: TCA GAT ATC GTC GAG TGC GGC CCA GGA TTC GAT

**Primers for qRT-PCR**

*SigA\_F*: TCG ACT ACA CCA AGG GCT AC

*SigA\_R*: TGA TCA CCT CGA CCA TGT GC

*msm1946\_qPCR\_F*: GTG CAG TAC CTC GGC AGT CA

*msm1946\_qPCR\_R*: GCC GAT CGC GTG GAA TC
